# Supplementary material for: Temperature Dependence of the Beating Frequency of hiPSC-CMs Using a MEMS Force Sensor
Source: MDPI journal article supplement (doi:10.3390/s23073370), 2023-03-23
Supplement: s1 [file s1]

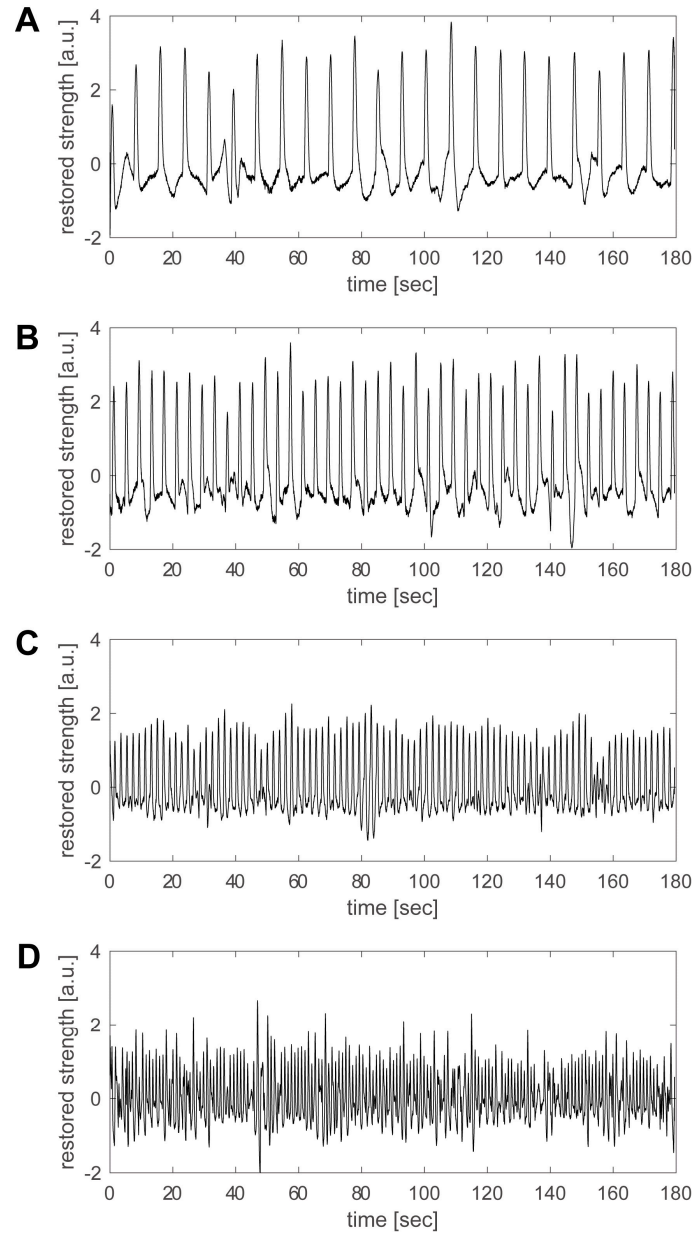

**Figure S1.** Beating data of hiPSC-CMs group A at various temperatures. These data correspond to Figure 7 in the manuscript. Each graph is the signal at the temperatures shown below. (A) 22°C (B) 24°C (C) 28°C (D) 32°C.

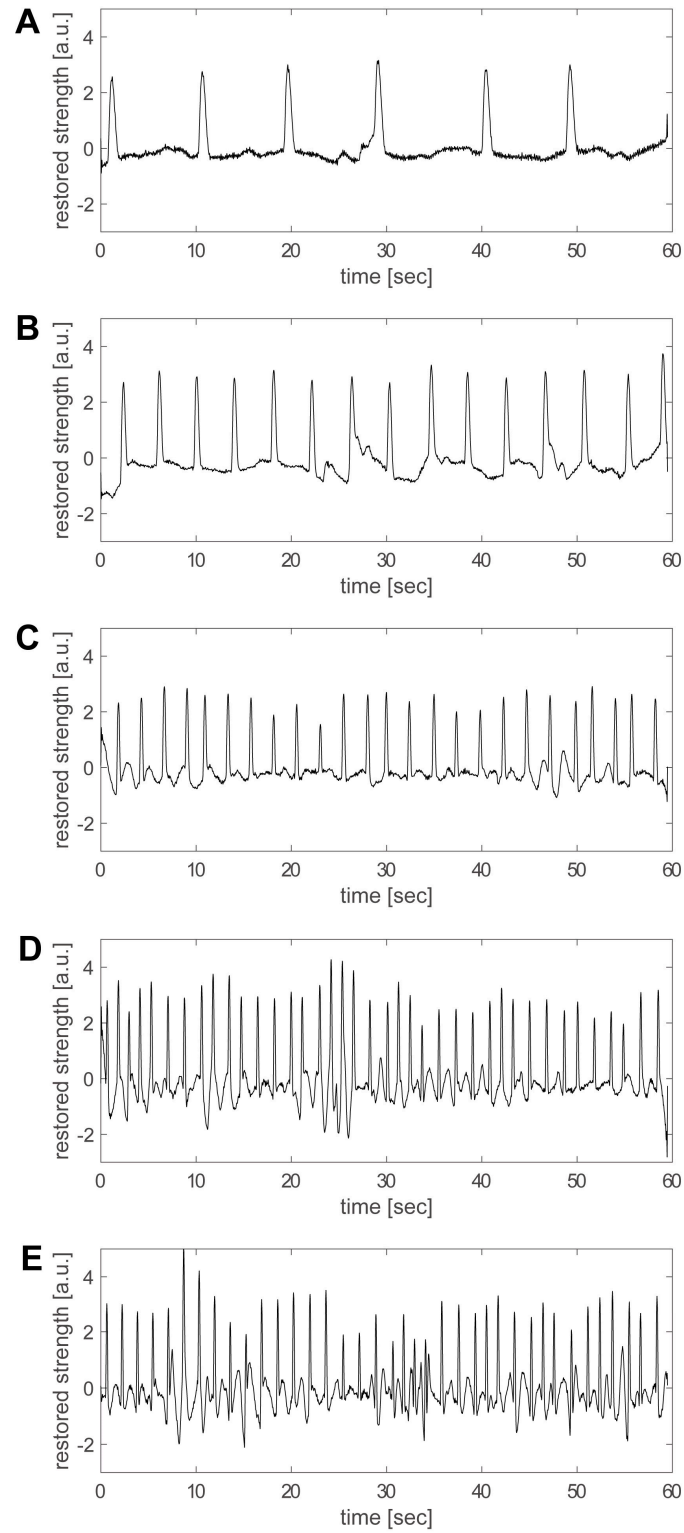

**Figure S2.** Beating data of hiPSC-CMs group B at various temperatures. These data correspond to Figure 7 in the manuscript. Each graph is the signal at the temperatures shown below. (A) 22°C (B) 24°C (C) 28°C (D) 32°C (E) 36°C.

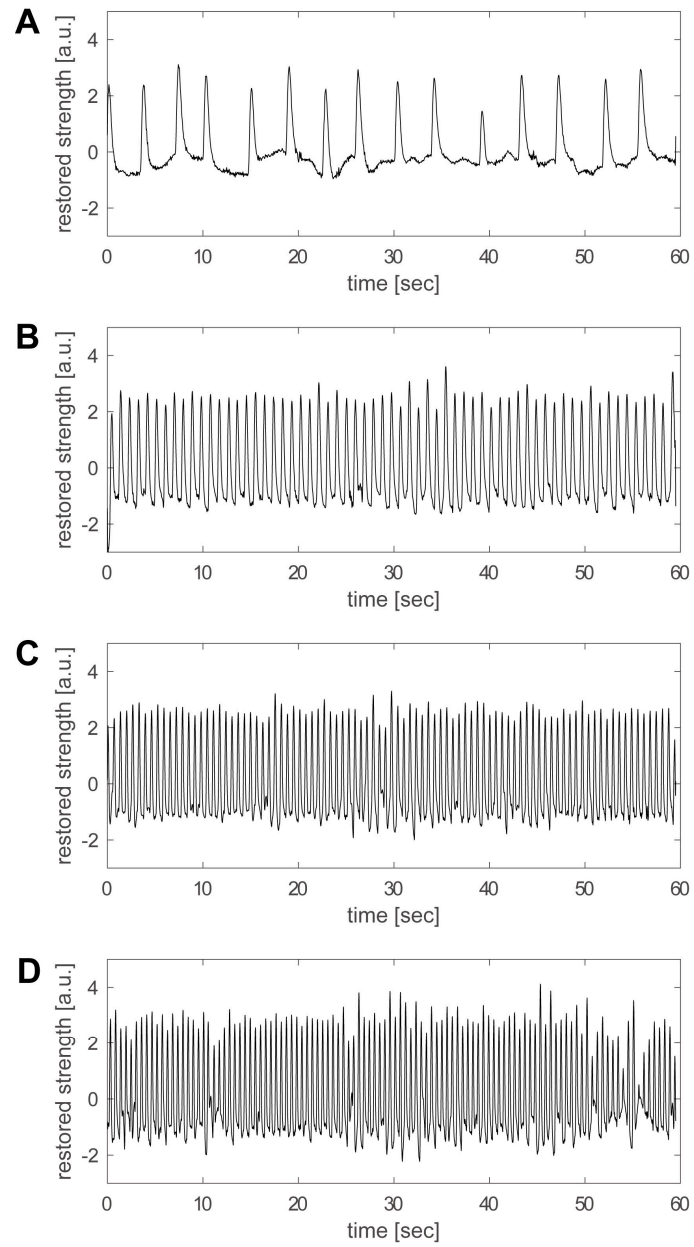

**Figure S3.** Beating data of hiPSC-CMs group C at various temperatures. These data correspond to Figure 7 in the manuscript. Each graph is the signal at the temperatures shown below. (A) 22°C (B) 24°C (C) 28°C (D) 32°C.

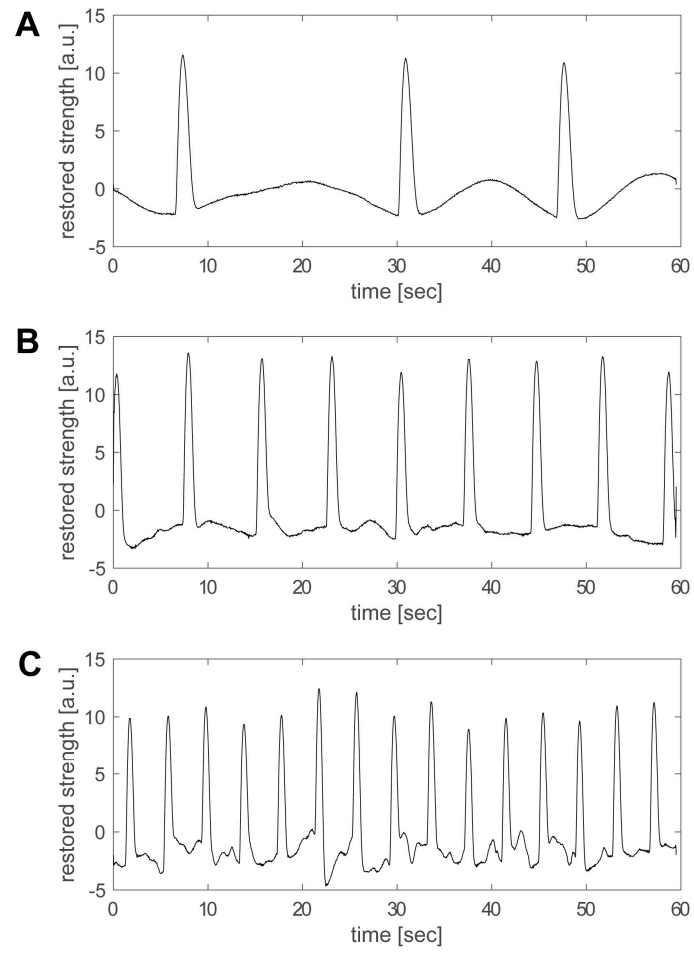

**Figure S4.** Beating data of hiPSC-CMs group E at various temperatures. These data correspond to Figure 7 in the manuscript. Each graph is the signal at the temperatures shown below. (A) 22°C (B) 24°C (C) 28°C.

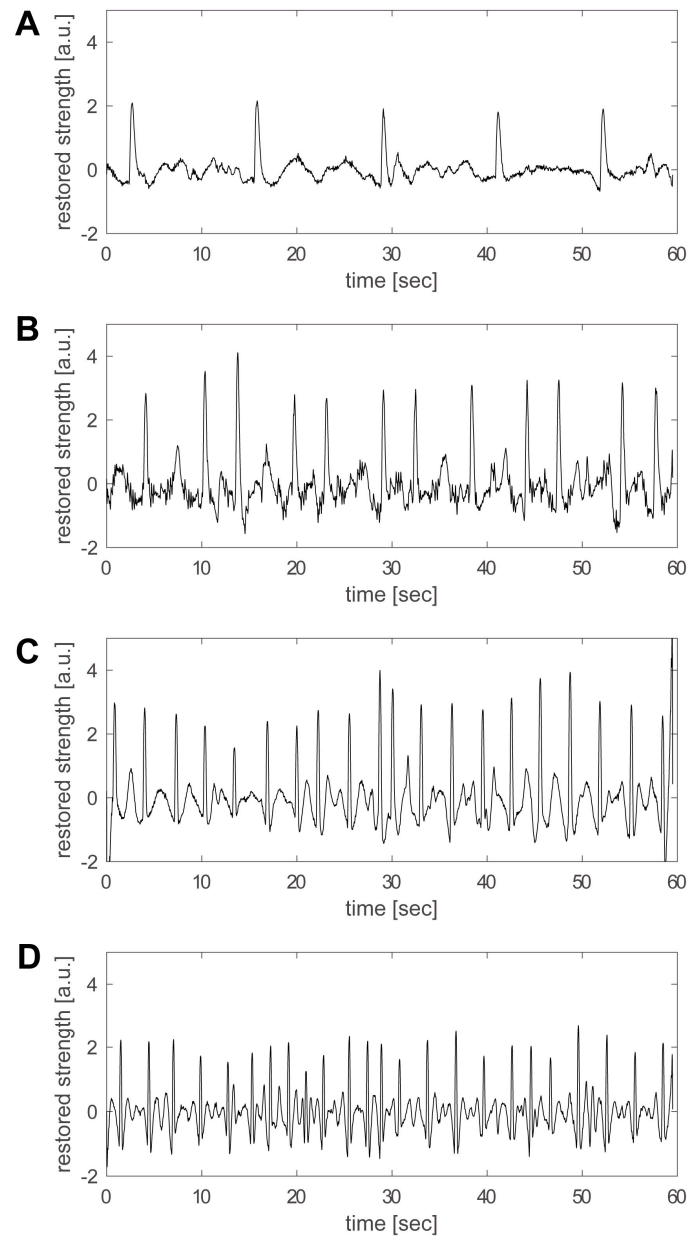

**Figure S5.** Beating data of hiPSC-CMs group F at various temperatures. These data correspond to Figure 7 in the manuscript. Each graph is the signal at the temperatures shown below. (A) 22°C (B) 24°C (C) 28°C (D) 32°C.

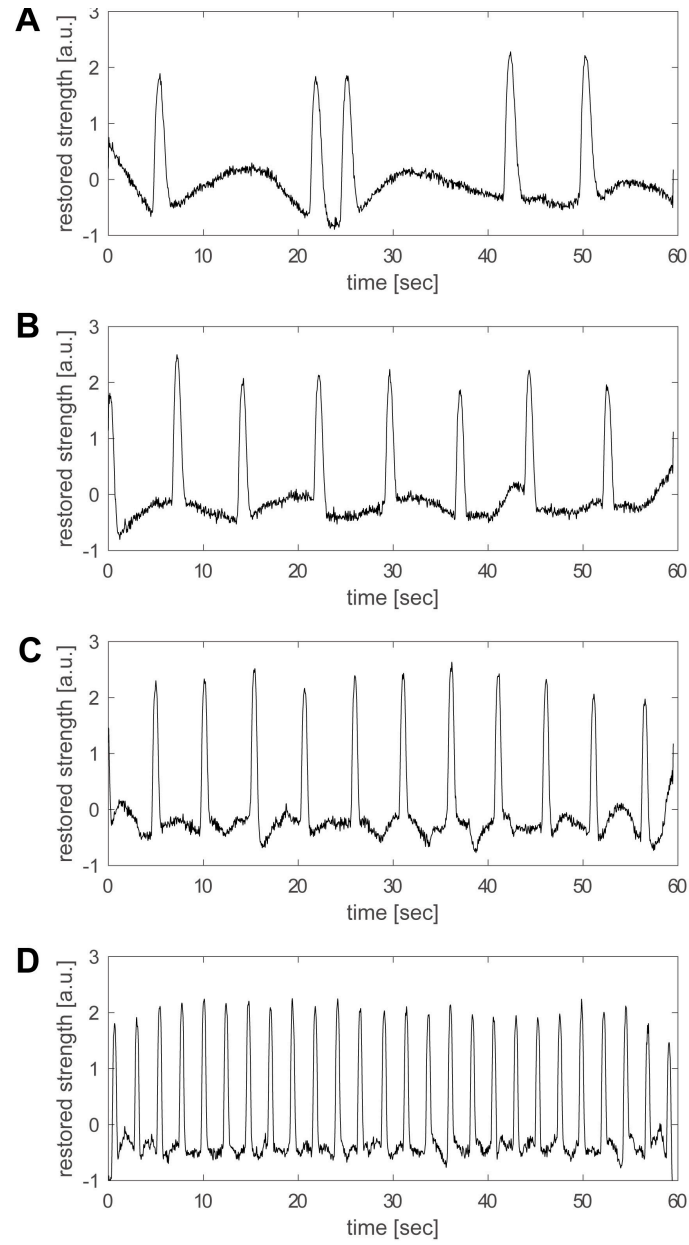

**Figure S6.** Beating data of hiPSC-CMs group G at various temperatures. These data correspond to Figure 7 in the manuscript. Each graph is the signal at the temperatures shown below. (A) 22°C (B) 24°C (C) 28°C (D) 32°C.

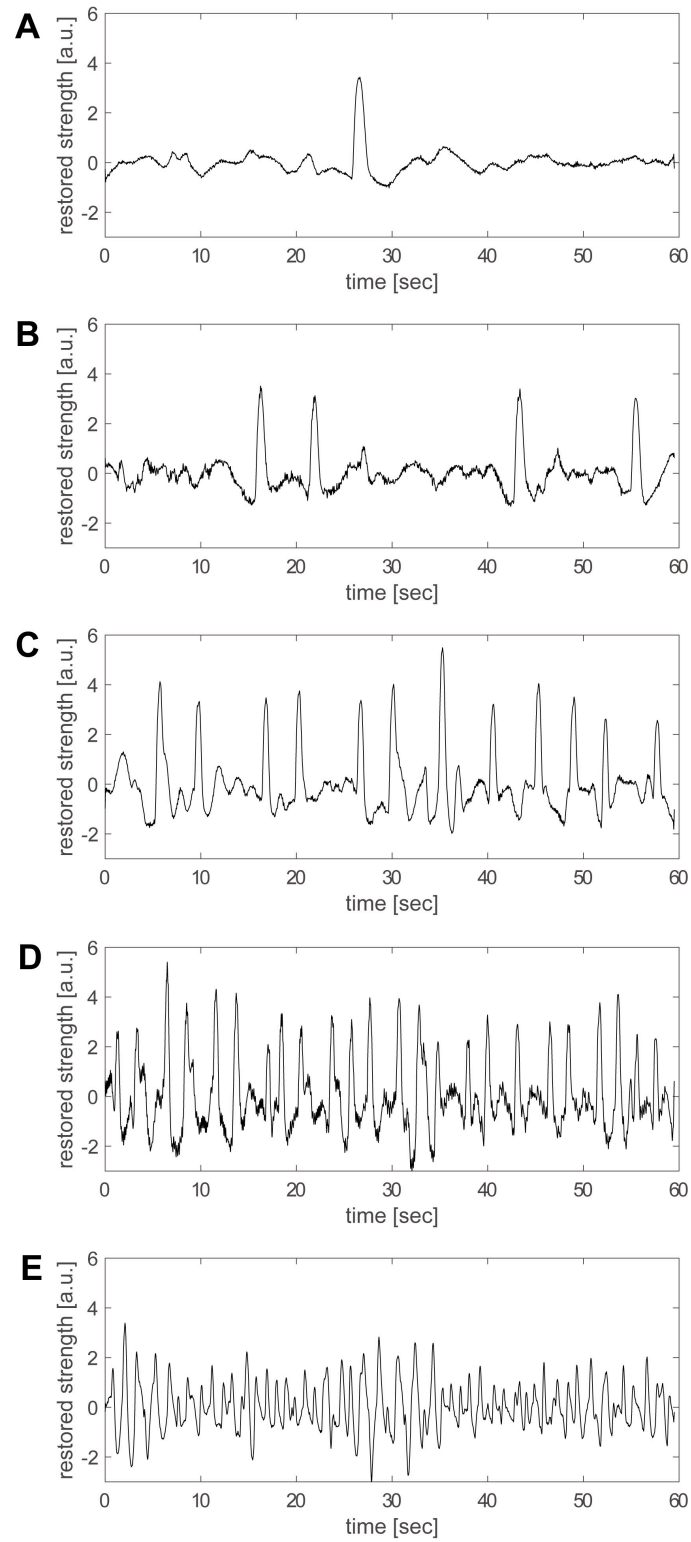

**Figure S7.** Beating data of hiPSC-CMs group H at various temperatures. These data correspond to Figure 7 in the manuscript. Each graph is the signal at the temperatures shown below. (A) 22°C (B) 24°C (C) 28°C (D) 32°C (E) 36°C.

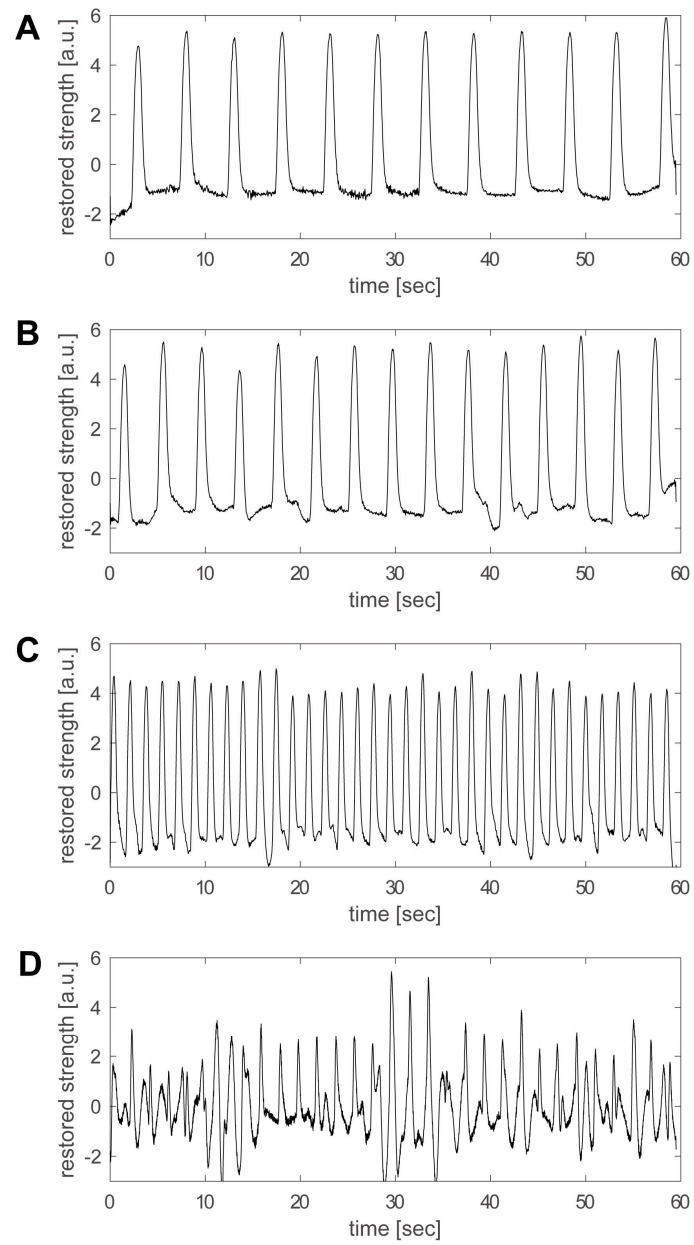

**Figure S8.** Beating data of hiPSC-CMs group I at various temperatures. These data correspond to Figure 7 in the manuscript. Each graph is the signal at the temperatures shown below. (A) 22°C (B) 24°C (C) 28°C (D) 32°C.



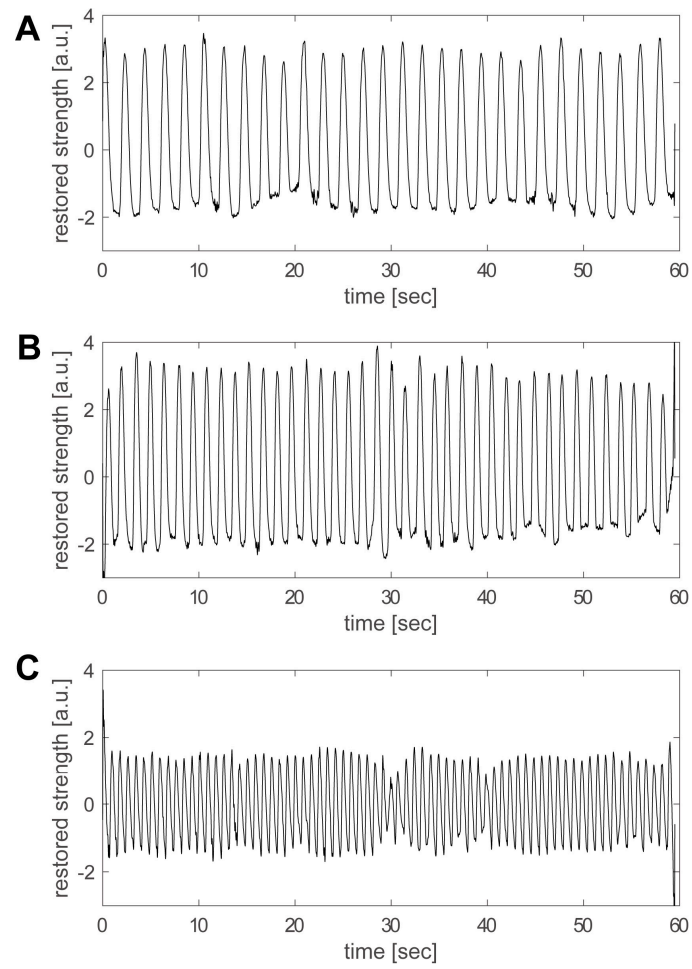

**Figure S9.** Beating data of hiPSC-CMs group J at various temperatures. These data correspond to Figure 7 in the manuscript. Each graph is the signal at the temperatures shown below. (A) 22°C (B) 24°C (C) 28°C.

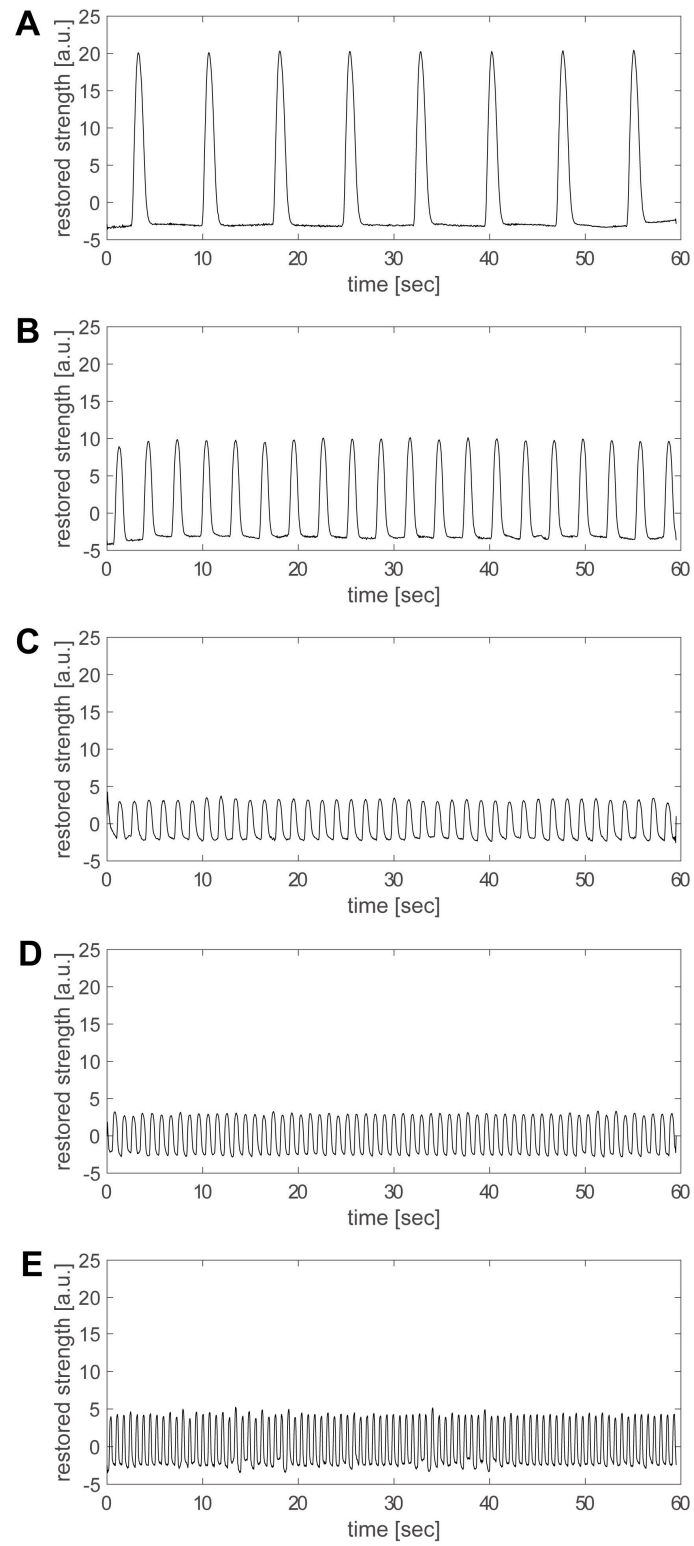

**Figure S10.** Beating data of hiPSC-CMs group K at various temperatures. These data correspond to Figure 7 in the manuscript. Each graph is the signal at the temperatures shown below. (A) 22°C (B) 24°C (C) 28°C (D) 32°C (E) 36°C.
